# Supplementary material for: Neuroprotective Effects of VEGF in the Enteric Nervous System
Source: MDPI journal article supplement (doi:10.3390/ijms23126756), 2022-06-17
Supplement: s1 [file s1]

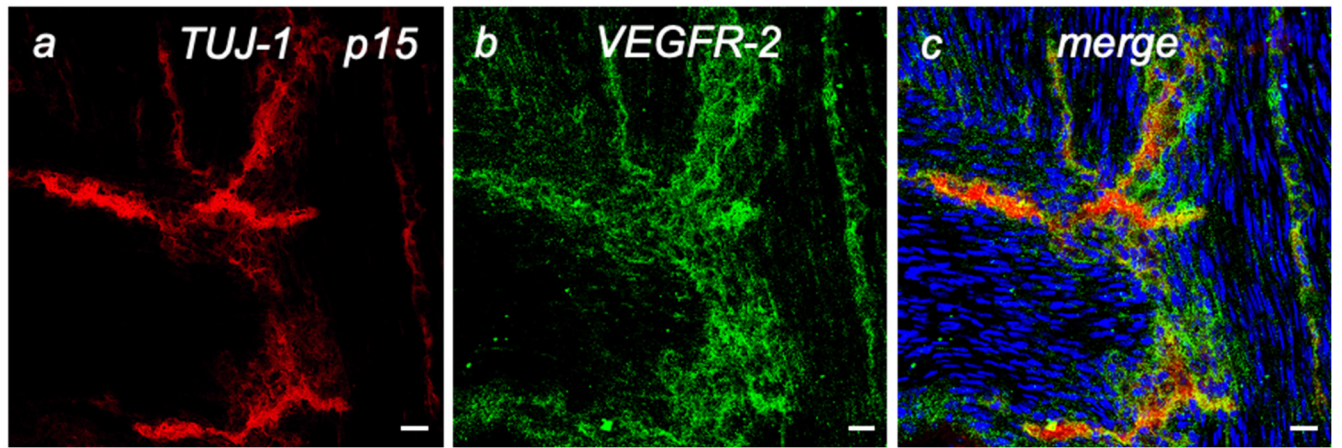

**Figure S1.** (a–c) Exemplary immunostaining of TUJ-1-positive neurons at p15, VEGFR-2 (green) and cell nuclei (blue) also show the colocalization of VEGFR-2 and myenteric neurons. The same exposure settings were used for all exposures. Scale bars: 20  $\mu\text{m}$ .
